# Supplementary material for: Incidences and Prognostic Impact of c-KIT, WT1, CEBPA, and CBL Mutations, and Mutations Associated With Epigenetic Modification in Core Binding Factor Acute Myeloid Leukemia: A Multicenter Study in a Korean Population
Source: PubMed Central journal article supplement — Ann Lab Med. 2015 Apr 1;35(3):288–97. doi: 10.3343/alm.2015.35.3.288 (PMC4390696; doi:10.3343/alm.2015.35.3.288), 2015-04-01
Supplement: alm-35-288-s001.pdf [file alm-35-288-s001.pdf]

**Supplementary table 1.** Summary of all informations about primer sequences, melting temperatures of each primer used in the amplification of nine genes and size of PCR product

| Genes                 | Forward primers               |                     | Reverse primers            |                     | Size of PCR product (bp) |
|-----------------------|-------------------------------|---------------------|----------------------------|---------------------|--------------------------|
|                       | Sequences                     | T <sub>m</sub> (°C) | Sequences                  | T <sub>m</sub> (°C) |                          |
| <i>c-KIT</i> exon 8   | GCTGAGGTTTTCCAGCACTC          | 61.7                | AATTGCAGTCCTTCCCCTCT       | 61.3                | 219                      |
| <i>c-KIT</i> exon 17  | TGGTTTTCTTTCTCCTCCAA          | 57.4                | TGCAGGACTGTCAAGCAGAG       | 62.6                | 185                      |
| <i>NPM1</i> exon 12   | GTTTCTTTTTTTTTTCCAGGCTATTCAAG | 59.9                | CACGGTAGGGAAAGTTCTCACTCTGC | 65.6                | 170                      |
| <i>CEBPA</i> exon 1 A | CGCCATGCCGGGAGAACTCT          | 67.3                | CTTCTCCTGCTGCCGGCTGT       | 67.5                | 299                      |
| <i>CEBPA</i> exon 1 B | GCCGCCTCAACGACGAGTT           | 66.2                | CTTGGCTTCATCCTCCTCGC       | 63.4                | 303                      |
| <i>CEBPA</i> exon 1 C | CCGCTGGTGATCAAGCAGGA          | 65.1                | CCGGTACTCGTTGCTGTCT        | 62.6                | 390                      |
| <i>CEBPA</i> exon 1 D | CAAGGCCAAGAAGTCGGTGGACA       | 66.5                | CACGGTCTGGGCAAGCCTCGAGAT   | 69.7                | 356                      |
| <i>WT1</i> exon 7     | CAGTGCTCACTCCCTCAAG           | 62.2                | AGTGTGAGAGCCTGGAAAGG       | 61.9                | 300                      |
| <i>WT1</i> exon 9     | GTGAGGCAGATGCAGACATTG         | 61.7                | CCTCTCATCACAAATTCATTCCA    | 58.3                | 297                      |
| <i>IDH1</i> exon 4    | GCCATCACTGCAGTTGTAGGTT        | 62.9                | CACATACAAGTTGGAAATTTCTGG   | 57.8                | 439                      |
| <i>IDH2</i> exon 4    | GGGGTTCAAATCTGGTTGAA          | 58.8                | CTGTGGCCTTGTACTGCAGAG      | 63.1                | 323                      |
| <i>DNMT3A</i> exon 23 | ACTAAGCAGGCGTCAGAGGAG         | 63.7                | TCCATCCTCATGTTCTTGGTG      | 59.8                | 393                      |
| <i>EZH2</i> exon 17   | CCTTTTGTGGCTTTTCTCC           | 58.9                | ATCCTCCTTCTGGTCACTCA       | 62.2                | 310                      |
| <i>EZH2</i> exon 18   | AGGCAAACCCTGAAGAACTGT         | 62.0                | GATGGCTCTCTTGGCAAAAAT      | 59.3                | 396                      |
| <i>EZH2</i> exon 19   | CGTTTTGCAAATCATTGGTA          | 57.9                | ATTCCCCTAATGCTCATGG        | 60.0                | 413                      |
| <i>CBL</i> exon 8     | ACCCAGACTAGATGCTTTCTG         | 59.3                | AGGCCACCCCTTGTATCAGT       | 63.3                | 385                      |
| <i>CBL</i> exon 9     | CCTGGCTTTGGGGTTAGGTTT         | 62.9                | GACAACCTACAATGGATTTGCC     | 60.4                | 375                      |

Abbreviations: *NPM*, nucleophosmin; *CEBPA*, CCAAT/enhancer binding protein alpha; *WT*, Wilms tumor; *IDH*, isocitrate dehydrogenase; *DNMT3A*, DNA (cytosine-5-)-methyltransferase 3 alpha; *EZH*, enhancer of zeste homolog; *CBL*, casitas b-lineage lymphoma; T<sub>m</sub>, melting temperature of primer; bp, base pairs.
